# Supplementary material for: MicroRNA-206 promotes the recruitment of CD8+ T cells by driving M1 polarisation of Kupffer cells
Source: HighWire-hosted journal article supplement (doi:10.1136/gutjnl-2021-324170), 2021-10-27
Supplement: gutjnl-2021-324170supp001_data_supplement.pdf [file gutjnl-2021-324170supp001_data_supplement.pdf]

## Supplemental Figure 1

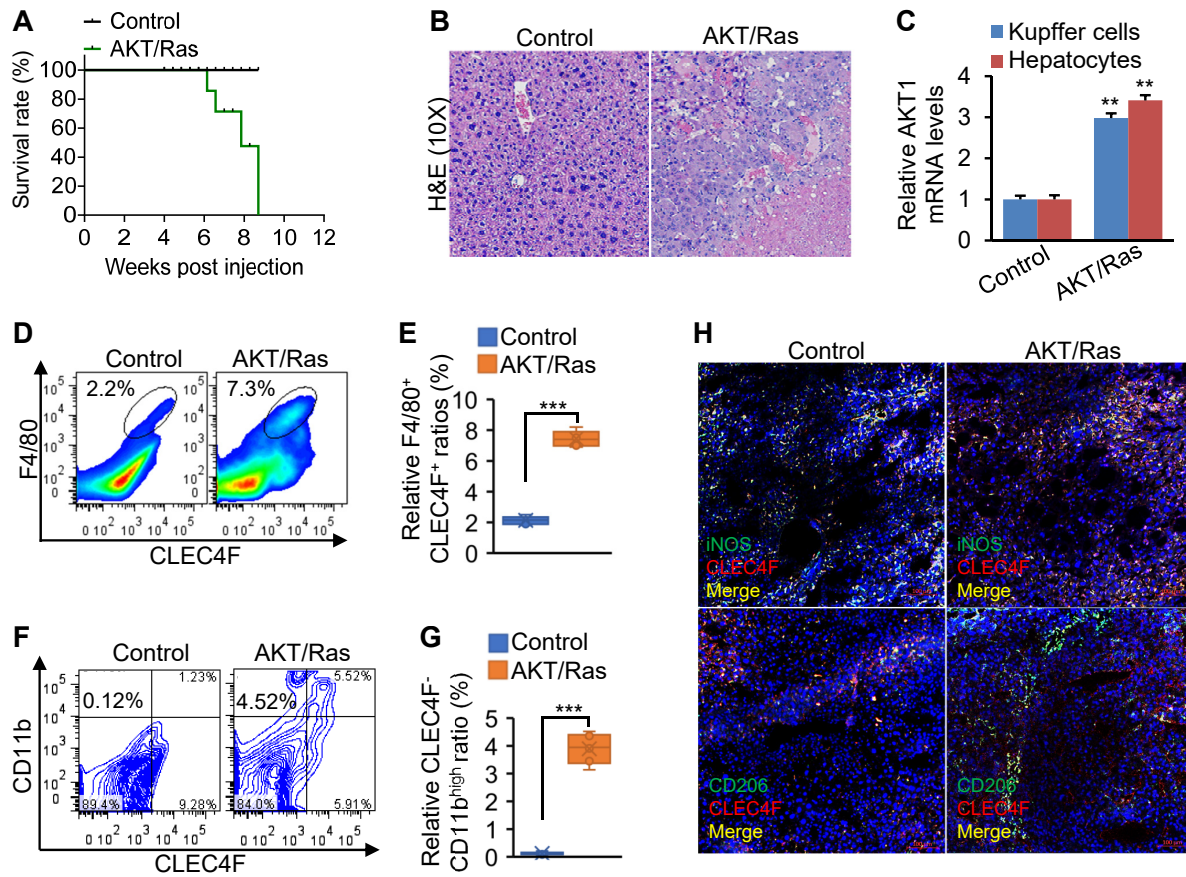

**Supplemental Figure 1 Hydrodynamic injection of AKT/Ras led to activation of AKT signaling in hepatocytes and KCs and triggered the development of lethal HCC. (A)** Kaplan-Meier survival curves of FVB/NJ mice injected with pT3-EF1 $\alpha$  (Control,  $n=6$ ) or AKT/Ras ( $n=6$ ) (log-rank test). **(B)** H&E staining (10X) of livers in two groups of mice. **(C)** qRT-PCR quantitation of *AKT1* mRNA levels in hepatocytes and KCs in two groups of mice (Mann-Whitney test). **(D-G)** Total numbers of KCs (CLEC4F $^+$ F4/80 $^+$ ) and infiltrating macrophages (CD11b $^{\text{high}}$ CLEC4F $^-$ ) in FVB/NJ mice injected with pT3-EF1 $\alpha$  (Control,  $n=6$ , 5 w.p.i) or AKT/Ras ( $n=6$ , 5 w.p.i) (Mann-Whitney test). w.p.i: weeks post injection. **(H)** Immunostaining of iNOS, CD206 and CLEC4F (10X) in livers of two groups of mice (Mann-Whitney test). Data represent mean  $\pm$  SEM. \*\* $p < 0.01$ . Scale bar: 100  $\mu\text{m}$ .
