# Supplementary material for: MicroRNA-206 promotes the recruitment of CD8+ T cells by driving M1 polarisation of Kupffer cells
Source: HighWire-hosted journal article supplement (doi:10.1136/gutjnl-2021-324170), 2021-10-27
Supplement: gutjnl-2021-324170supp005_data_supplement.pdf [file gutjnl-2021-324170supp005_data_supplement.pdf]

## Supplemental Figure 5

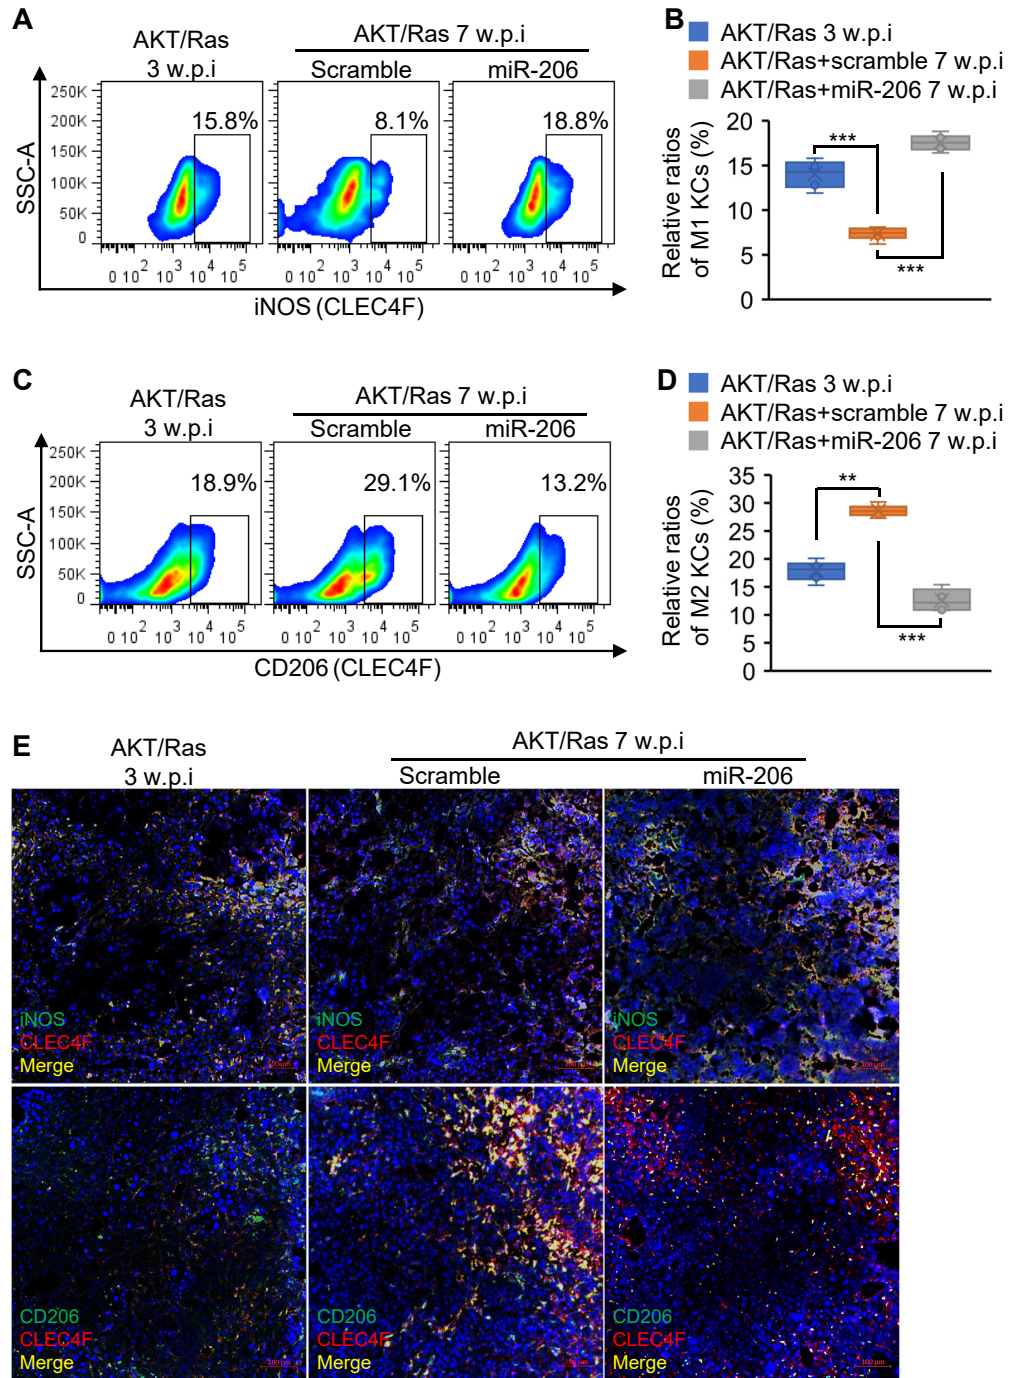

**Supplemental Figure 5 KC-specific expression of miR-206 drove M2 to M1 switch of KCs in AKT/Ras mice bearing HCC. (A-D)** The ratios of M1 or M2 KCs in livers of AKT/Ras ( $n=6$ , 3 w.p.i), AKT/Ras/MC-CD68p-scramble ( $n=6$ , 7 w.p.i) and AKT/Ras/MC-CD68p-miR-206 ( $n=6$ , 7 w.p.i) mice (two-way ANOVA test). **(E)** Immunostaining of iNOS, CD206 and CLEC4F (10X) in livers of three groups of mice (low magnification) (two-way ANOVA test). Data represent mean  $\pm$  SEM.  $**p < 0.01$  and  $***p < 0.001$ .
