# Supplementary material for: MicroRNA-206 promotes the recruitment of CD8+ T cells by driving M1 polarisation of Kupffer cells
Source: HighWire-hosted journal article supplement (doi:10.1136/gutjnl-2021-324170), 2021-10-27
Supplement: gutjnl-2021-324170supp006_data_supplement.pdf [file gutjnl-2021-324170supp006_data_supplement.pdf]

## Supplemental Figure 6

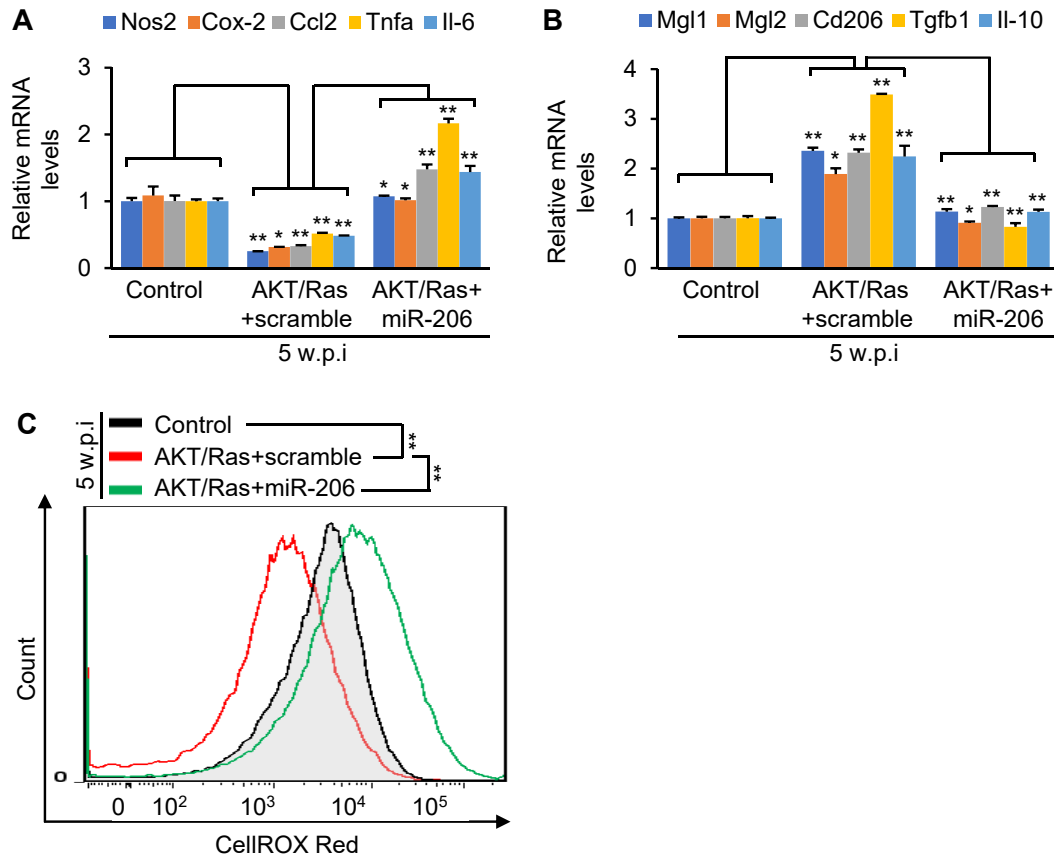

**Supplemental Figure 6 miR-206 offset the ability of AKT/Ras to drive M1 to M2 switch of KCs.** (A) mRNA levels of M1 marker genes in livers of FVB/NJ mice injected with pT3-EF1 $\alpha$  (control,  $n=6$ , 5 w.p.i), AKT/Ras/scramble ( $n=6$ , 5 w.p.i), or AKT/Ras/miR-206 ( $n=6$ , 5 w.p.i) (two-way ANOVA test). (B) mRNA levels of M2 marker genes in livers of three groups of mice (two-way ANOVA test). (C) Levels of oxidative stress in livers of three groups of mice, as revealed by CellRox Red staining (two-way ANOVA test). Data represent mean  $\pm$  SEM. \* $p < 0.05$ , \*\* $p < 0.01$ .
