# Supplementary material for: MicroRNA-206 promotes the recruitment of CD8+ T cells by driving M1 polarisation of Kupffer cells
Source: HighWire-hosted journal article supplement (doi:10.1136/gutjnl-2021-324170), 2021-10-27
Supplement: gutjnl-2021-324170supp007_data_supplement.pdf [file gutjnl-2021-324170supp007_data_supplement.pdf]

**Supplemental Figure 7**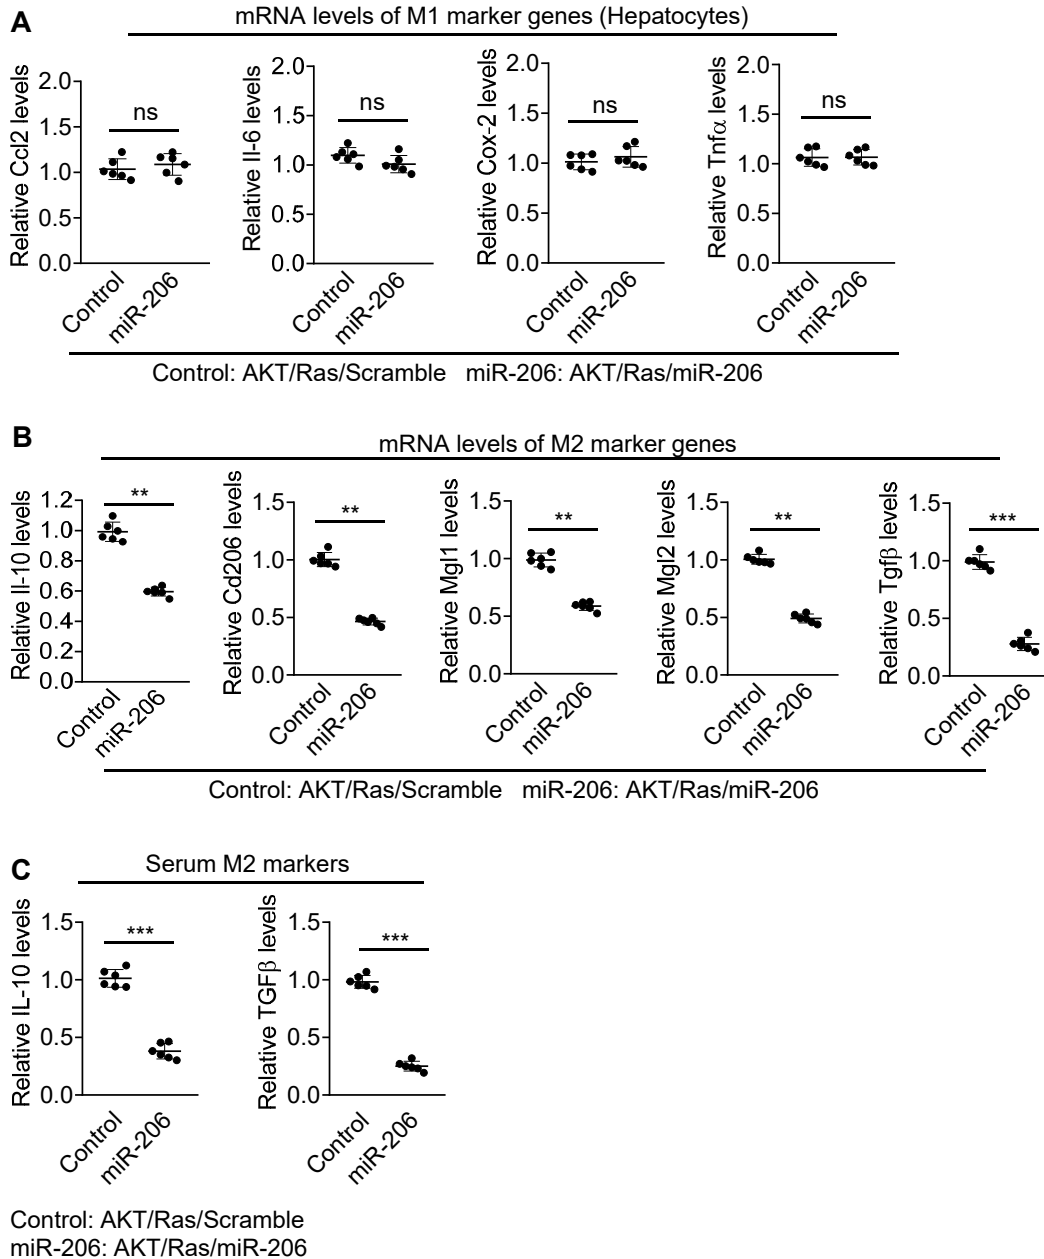

**Supplemental Figure 7 KC-specific expression of miR-206 drove M1 polarization of KCs.** (A) mRNA levels of M1 marker genes in hepatocytes of AKT/Ras mice injected with pT3-CD68p-scramble (control,  $n=6$ , 5 w.p.i) or pT3-CD68p-miR-206 ( $n=6$ , 5 w.p.i) (Mann-Whitney test). (B) mRNA levels of M2 marker genes in KCs of two groups of mice (Mann-Whitney test). (C) Serum levels of IL-10 and TGF $\beta$ 1 in two groups of mice (Mann-Whitney test). Data represent mean  $\pm$  SEM. \*\* $p < 0.01$ , \*\*\* $p < 0.001$  and ns: no significance.
