# Supplementary material for: MicroRNA-206 promotes the recruitment of CD8+ T cells by driving M1 polarisation of Kupffer cells
Source: HighWire-hosted journal article supplement (doi:10.1136/gutjnl-2021-324170), 2021-10-27
Supplement: gutjnl-2021-324170supp008_data_supplement.pdf [file gutjnl-2021-324170supp008_data_supplement.pdf]

## Supplemental Figure 8

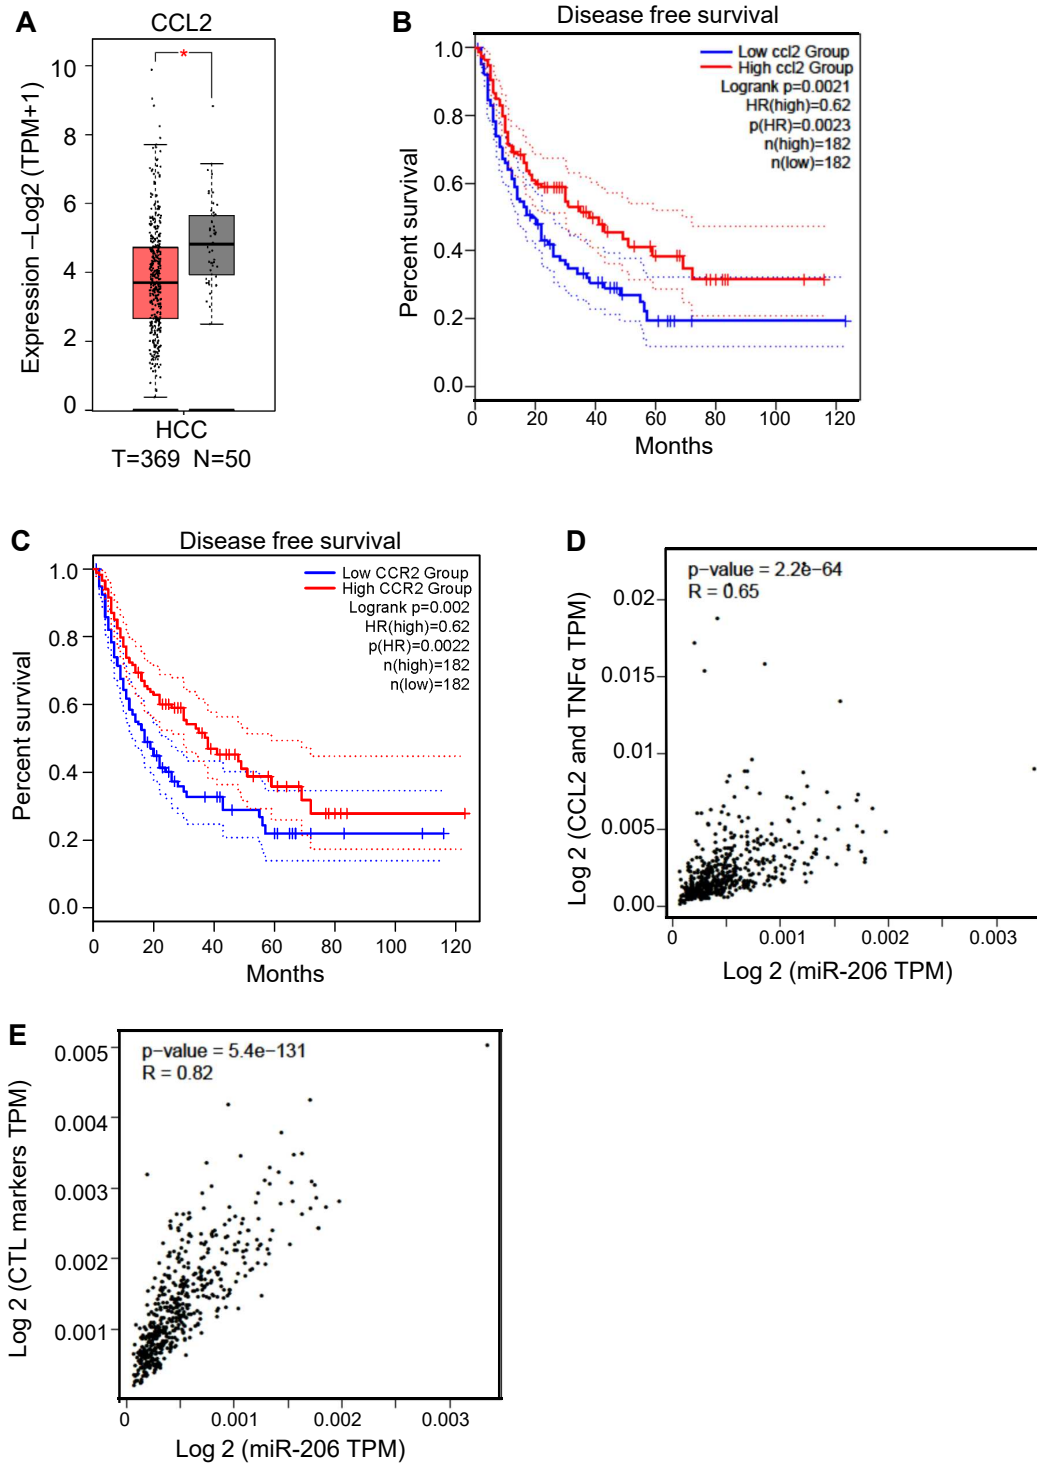

**Supplemental Figure 8 Levels of miR-206 were positively correlated with M1 markers and CTL signatures.** (A) Reduced CCL2 in HCC patients from the TCGA database (T: Tumor; N: normal liver tissues). TPM: transcripts per million. Expression levels were shown as Log<sub>2</sub> (TPM+1) (two-tailed student's *t* test). (B) Low levels of CCL2 predicted a poor survival rate of HCC patients in the TCGA database. Survival rates of HCC patients were determined via Kaplan–Meier analysis based on the data from the TCGA database (log-rank test). (C) The association between CCR2 levels and survival of HCC patients was determined via Kaplan–Meier analysis based on the data from the TCGA database (log-rank test). (D) A positive correlation between miR-206 and M1 markers of macrophages (CCL2 and TNF $\alpha$ ) in the TCGA HCC cohort. R = Spearman's correlation coefficient. TPM: Transcripts Per Million. (E) A positive correlation between miR-206 and CTL markers in the TCGA HCC cohort (two-tailed student's *t* test). R = Spearman's correlation coefficient. Data represent mean  $\pm$  SEM. \**p* < 0.05.
