# Supplementary material for: MicroRNA-206 promotes the recruitment of CD8+ T cells by driving M1 polarisation of Kupffer cells
Source: HighWire-hosted journal article supplement (doi:10.1136/gutjnl-2021-324170), 2021-10-27
Supplement: gutjnl-2021-324170supp013_data_supplement.pdf [file gutjnl-2021-324170supp013_data_supplement.pdf]

## Supplemental Figure 13

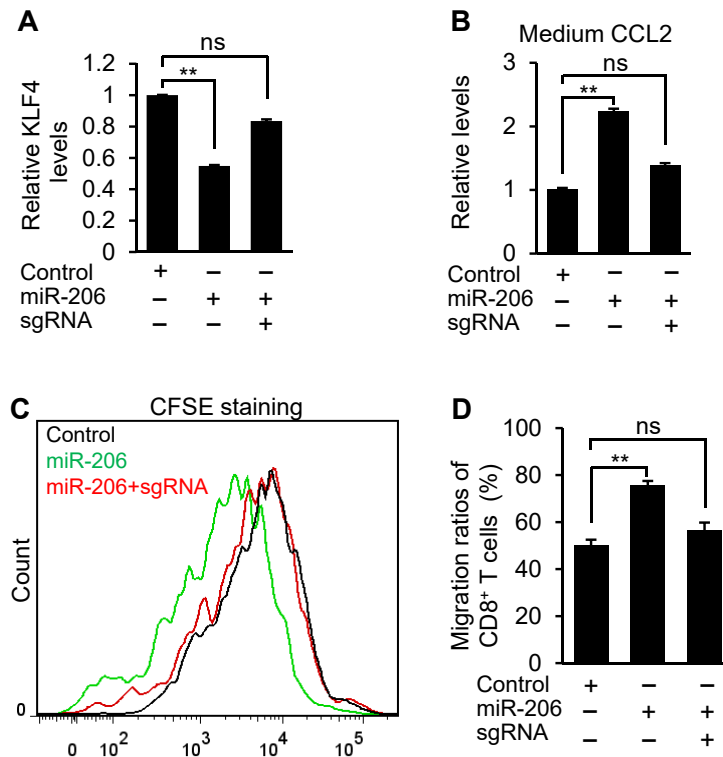

**Supplemental Figure 13 Ablation of the miR-206 binding site within the 3'UTR of *KLF4* impaired the ability of miR-206 to drive M1 polarization of THP-1 cells. (A)** mRNA levels of *KLF4* in THP-1 cells transfected with pT3-CD68p-scramble (control), pT3-CD68p-miR-206 (miR-206), or a combination of pT3-CD68p-miR-206 and the sgRNA (two-way ANOVA test). **(B)** Levels of CCL2 in the medium used for culturing three groups of THP-1 cells (two-way ANOVA test). **(C)** Proliferation of CD8<sup>+</sup> T cells co-cultured with three groups of THP-1 cells (two-way ANOVA test). **(D)** The migration ratios of CD8<sup>+</sup> T cells co-cultured with three groups of THP-1 cells (two-way ANOVA test). Data represent mean  $\pm$  SEM. \*\* $p < 0.01$  and ns: no significance.
