# Supplementary material for: MicroRNA-206 promotes the recruitment of CD8+ T cells by driving M1 polarisation of Kupffer cells
Source: HighWire-hosted journal article supplement (doi:10.1136/gutjnl-2021-324170), 2021-10-27
Supplement: gutjnl-2021-324170supp015_data_supplement.pdf [file gutjnl-2021-324170supp015_data_supplement.pdf]

## Supplemental Figure 15

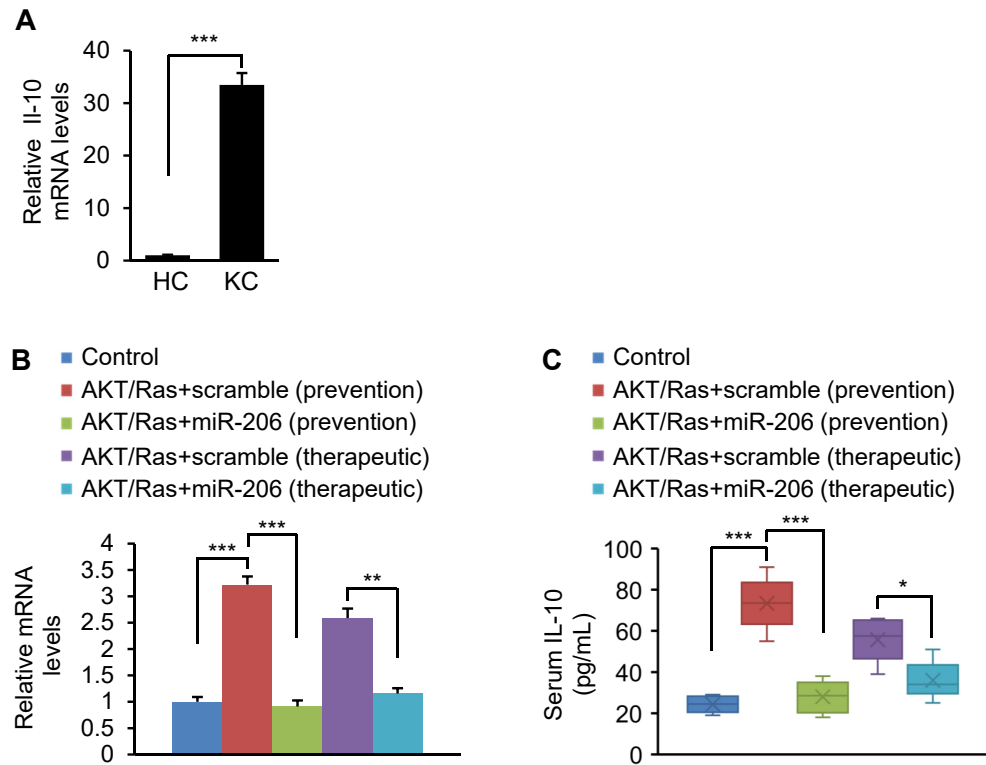

**Supplemental Figure 15 KC-specific expression of miR-206 inhibited expression of IL-10.** (A) mRNA levels of *Il-10* in KCs and hepatocytes isolated from healthy livers of FVB/NJ mice (two-tailed student's *t* test). (B) mRNA levels of *Il-10* in KCs of five groups of AKT/Ras mice injected with pT3-EF1 $\alpha$  (control,  $n=6$ , 5 w.p.i), pT3-CD68p-scramble ( $n=6$ , 5 w.p.i, prevention model), pT3-CD68p-miR-206 ( $n=6$ , 5 w.p.i, prevention model), MC-CD68p-scramble ( $n=6$ , 7 w.p.i, therapeutic model), or MC-CD68p-miR-206 ( $n=6$ , 7 w.p.i, therapeutic model) (two-way ANOVA test). (C) ELISA detection of serum IL-10 levels in five groups of mice (two-way ANOVA test). Data represent mean  $\pm$  SEM. \* $p < 0.05$ , \*\* $p < 0.01$  and \*\*\* $p < 0.001$ .
