# Supplementary material for: MicroRNA-206 promotes the recruitment of CD8+ T cells by driving M1 polarisation of Kupffer cells
Source: HighWire-hosted journal article supplement (doi:10.1136/gutjnl-2021-324170), 2021-10-27
Supplement: gutjnl-2021-324170supp016_data_supplement.pdf [file gutjnl-2021-324170supp016_data_supplement.pdf]

## Supplemental Figure 16

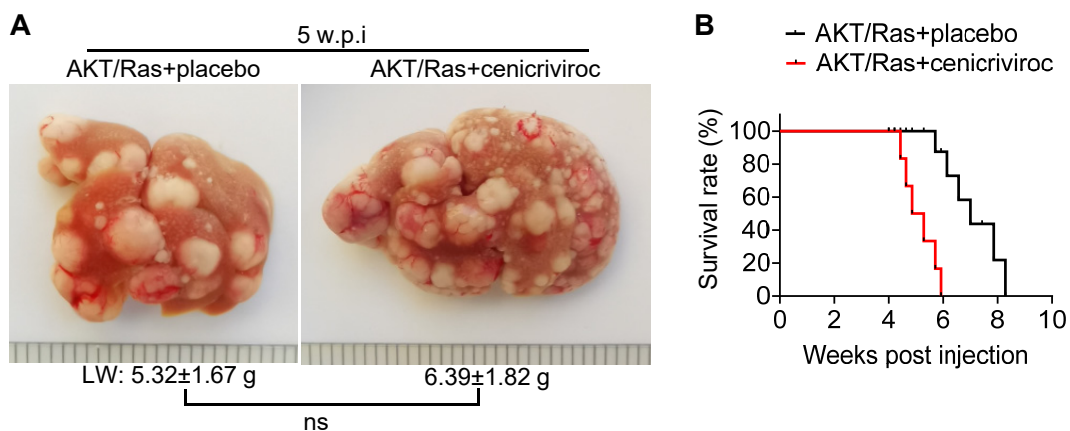

**Supplemental Figure 16 CCR2 antagonist slightly promoted growth of HCC in AKT/Ras mice.** (A) Macroscopic appearance of livers from AKT/Ras mice treated with placebo ( $n=6$ , 5 w.p.i) and cenicriviroc ( $n=6$ , 5 w.p.i) (Mann-Whitney U test). LW: liver weight. (B) Kaplan Meier survival curves of AKT/Ras mice injected with placebo ( $n=6$ ) and cenicriviroc ( $n=6$ ) (log-rank test). Data represent mean  $\pm$  SEM. ns: no significance.
